# Supplementary material for: The 2-oxoglutarate carrier promotes liver cancer by sustaining mitochondrial GSH despite cholesterol loading
Source: PubMed Central journal article supplement — Redox Biol. 2017 Sep 14;14:164–77. doi: 10.1016/j.redox.2017.08.022 (PMC5609874; doi:10.1016/j.redox.2017.08.022), 2017-09-14
Supplement: mmc7.pdf [file mmc7.pdf]

**Supplementary Table S1**

| <b>Patient</b> | <b>Gender</b> | <b>Age</b> | <b>Etiology</b> | <b>Tumor size and/or number of nodules (if available)</b>                    | <b>MELD</b> | <b>BLCC or any other clinical stage</b>                                                       |
|----------------|---------------|------------|-----------------|------------------------------------------------------------------------------|-------------|-----------------------------------------------------------------------------------------------|
| 1              | M             | 53         | HCV             | Multinodular                                                                 | 14          | Child A 6                                                                                     |
| 2              | F             | 69         | HC              | One 0,7cm cyst                                                               | 10          | Microvascular invasion                                                                        |
| 3              | M             | 46         | NASH-HC         | Necrotic nodule, 4 hepatocellular carcinoma regions and 4 dysplastic nodules | 9           | Child A                                                                                       |
| 4              | M             | 63         | HC              | 4 hepatocellular carcinoma regions and one colangiocarcinoma                 | 10          | Child A                                                                                       |
| 5              | M             | 56         | NAFLD-HC        | Two nodules (22 and 35 mm)                                                   | 7           | Residual necrotic nodule after hepatocellular carcinoma treatment in steatohepatitis context. |
| 6              | M             | 62         | ALD-HC          | Necrotic nodules and hepatocellular carcinomas in left and right lobes.      | 11          | Child C. Renal failure                                                                        |
| 7              | M             | 35         | ALD-HC          | Necrotic nodule (10 mm)                                                      | 32          | Child C                                                                                       |
| 8              | M             | 52         | HCV, ALD-HC     | One nodule                                                                   | 10          | NR                                                                                            |
