# Supplementary figures and images for: The 2-oxoglutarate carrier promotes liver cancer by sustaining mitochondrial GSH despite cholesterol loading
Source: PubMed Central journal article supplement — Redox Biol. 2017 Sep 14;14:164–77. doi: 10.1016/j.redox.2017.08.022 (PMC5609874; doi:10.1016/j.redox.2017.08.022), 2017-09-14

# Supp. Figure 1

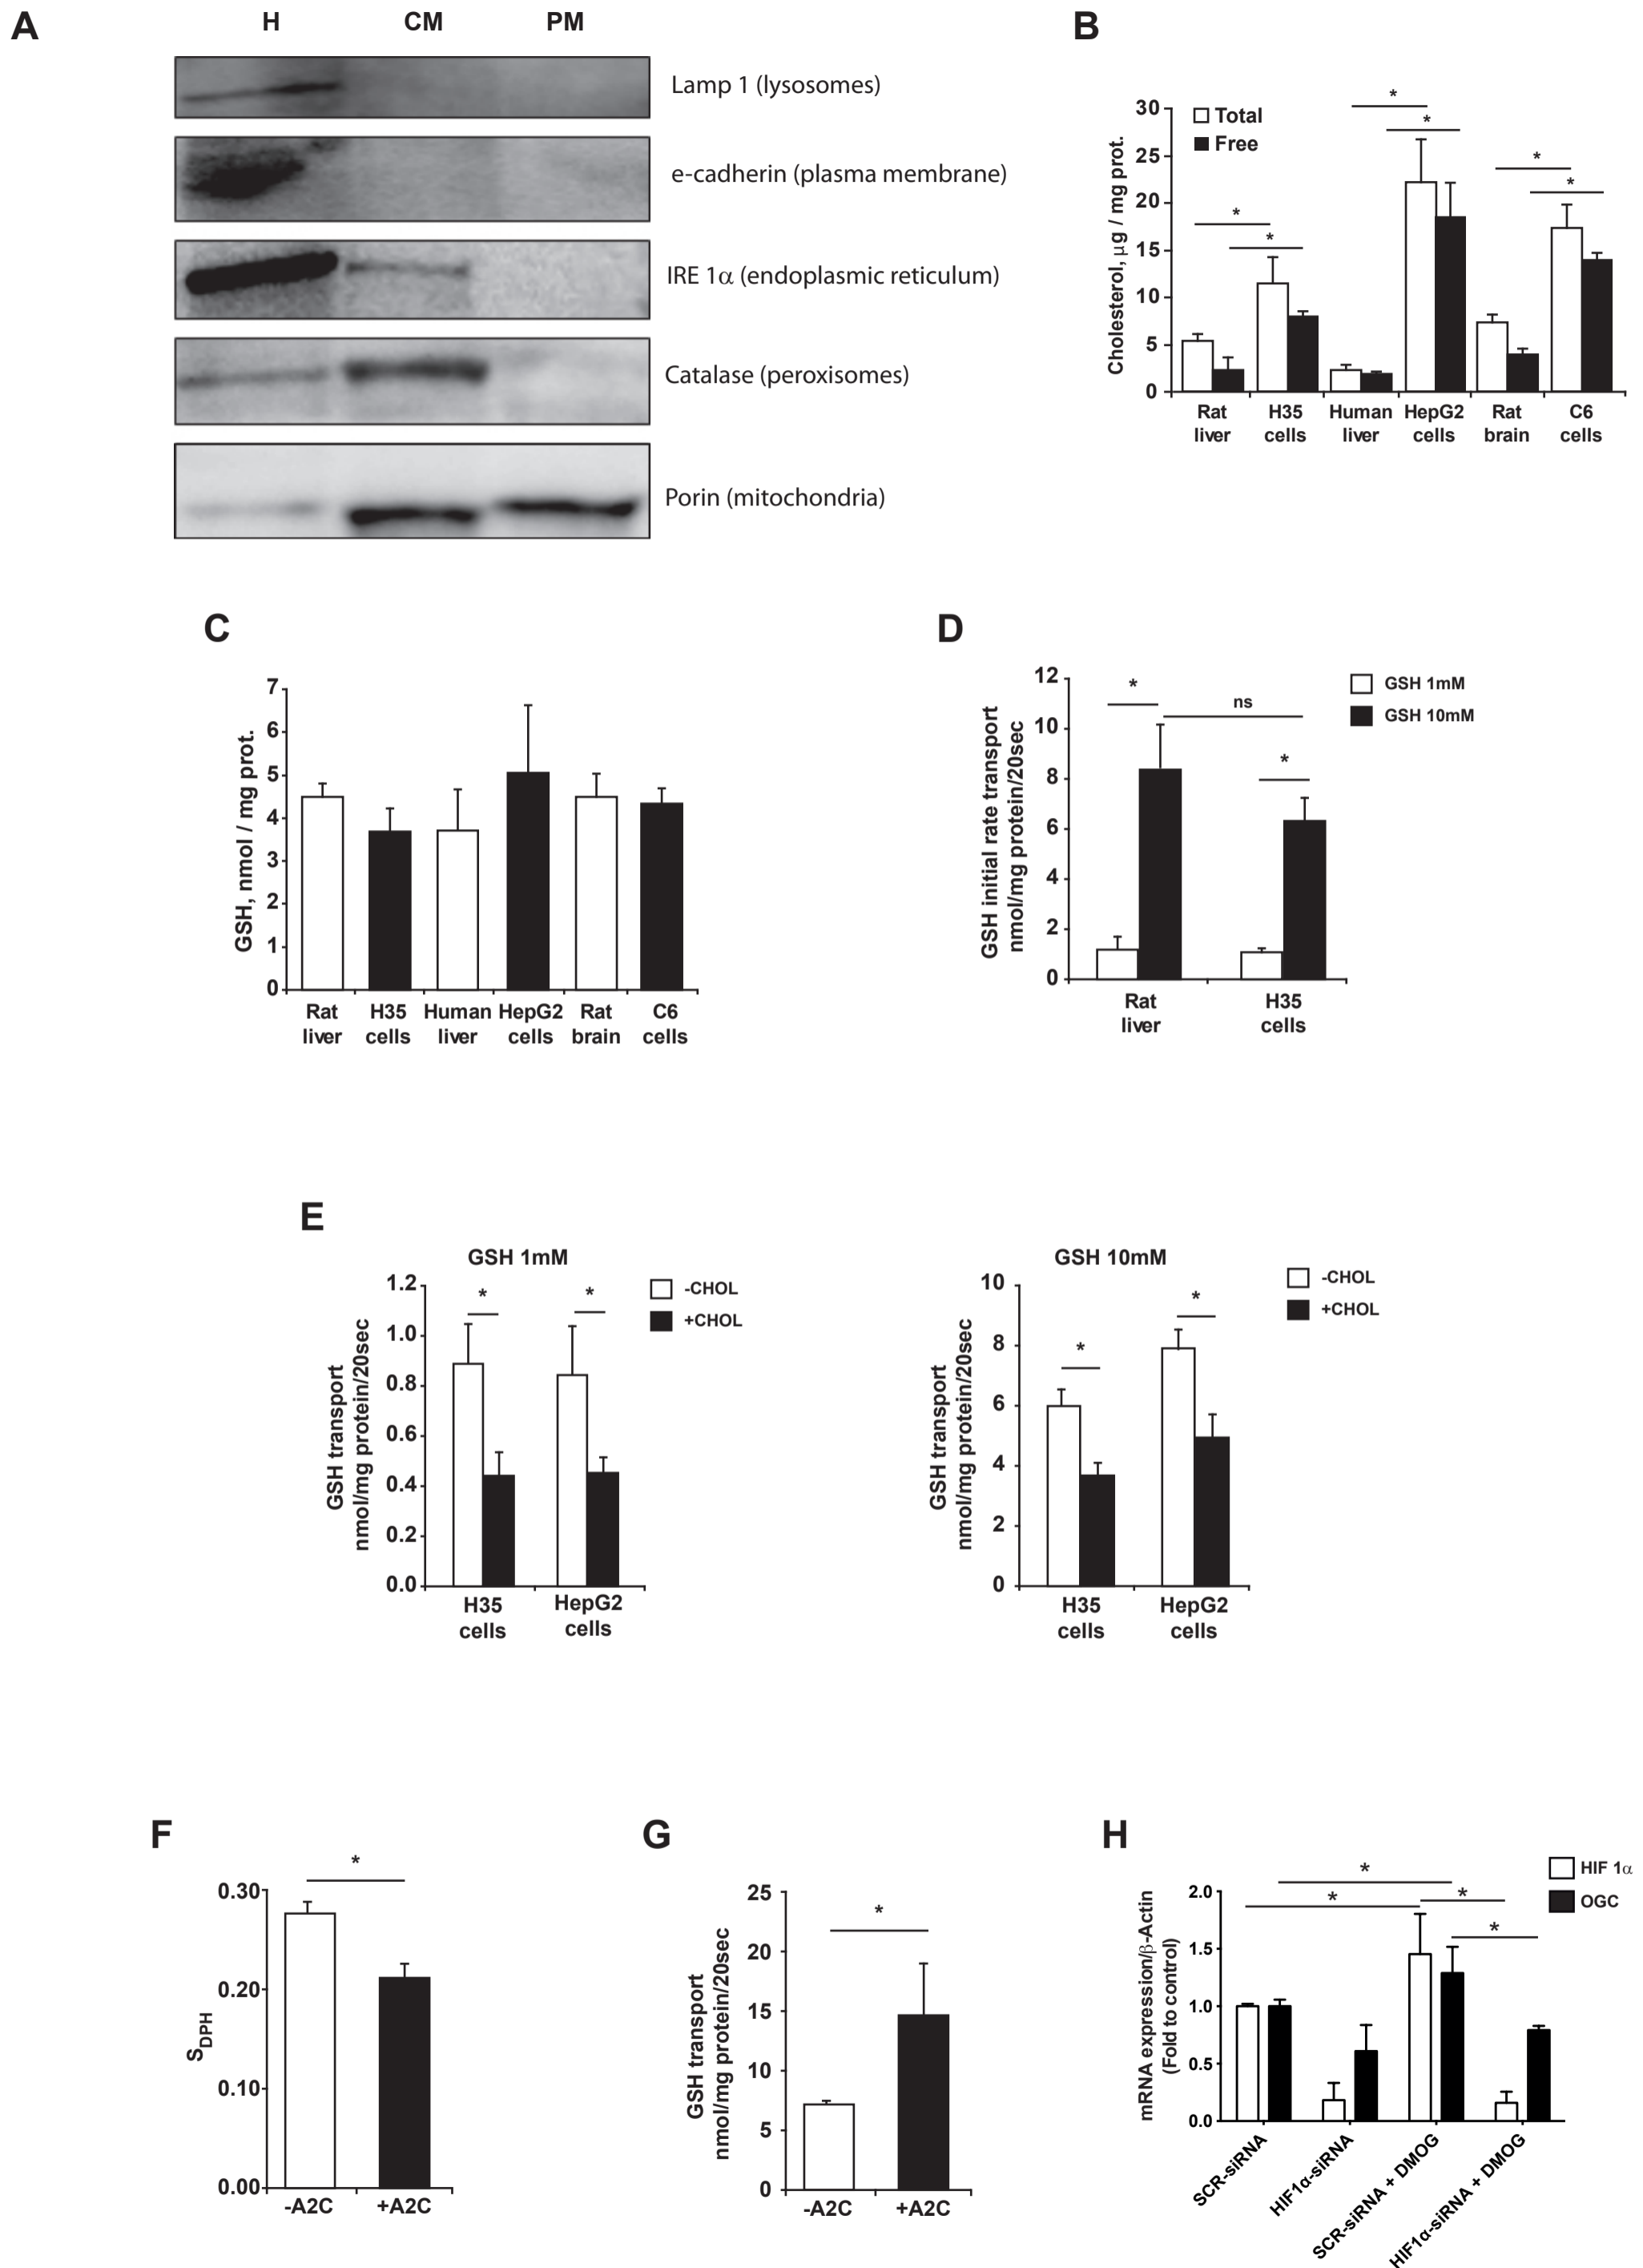

Supplement: mmc1.pdf [file mmc1.pdf]

## Supp. Figure 2

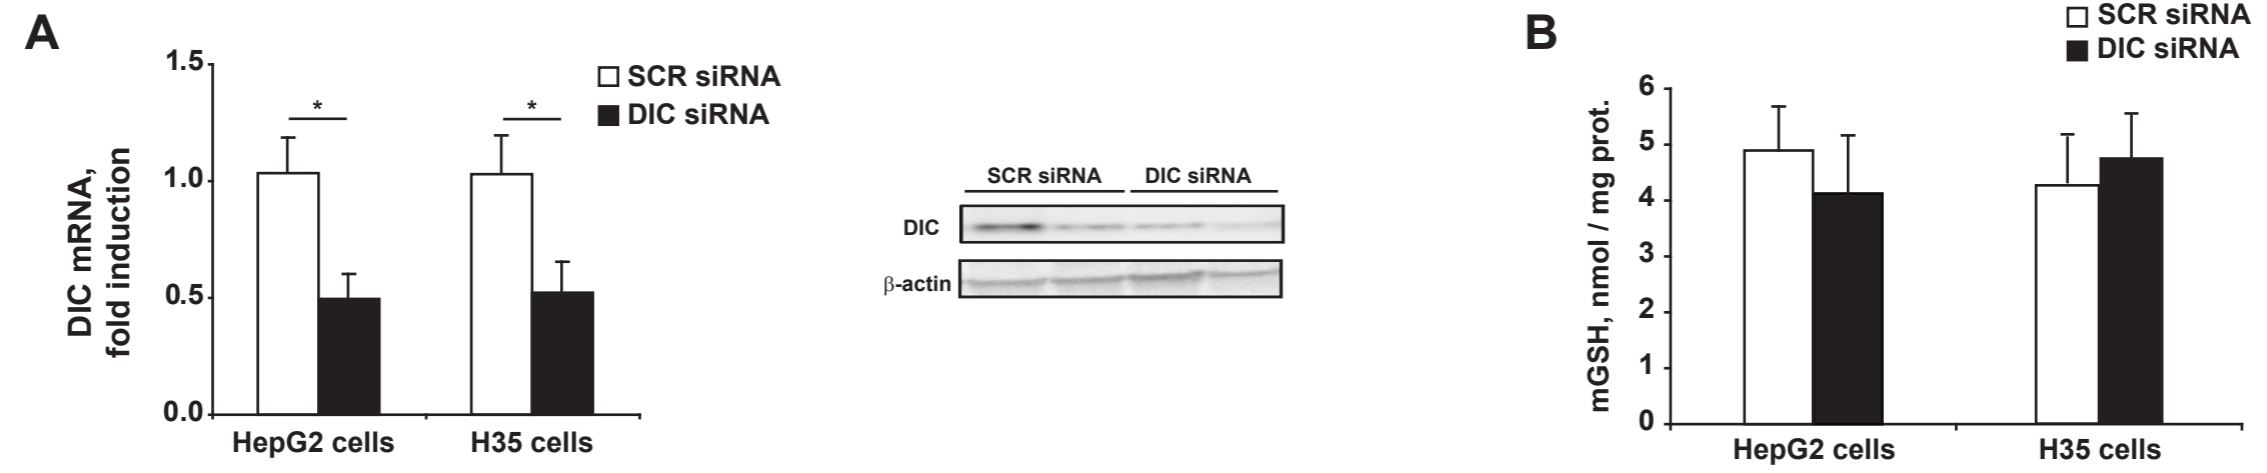

Supplement: mmc2.pdf [file mmc2.pdf]

### Supp. Figure 3

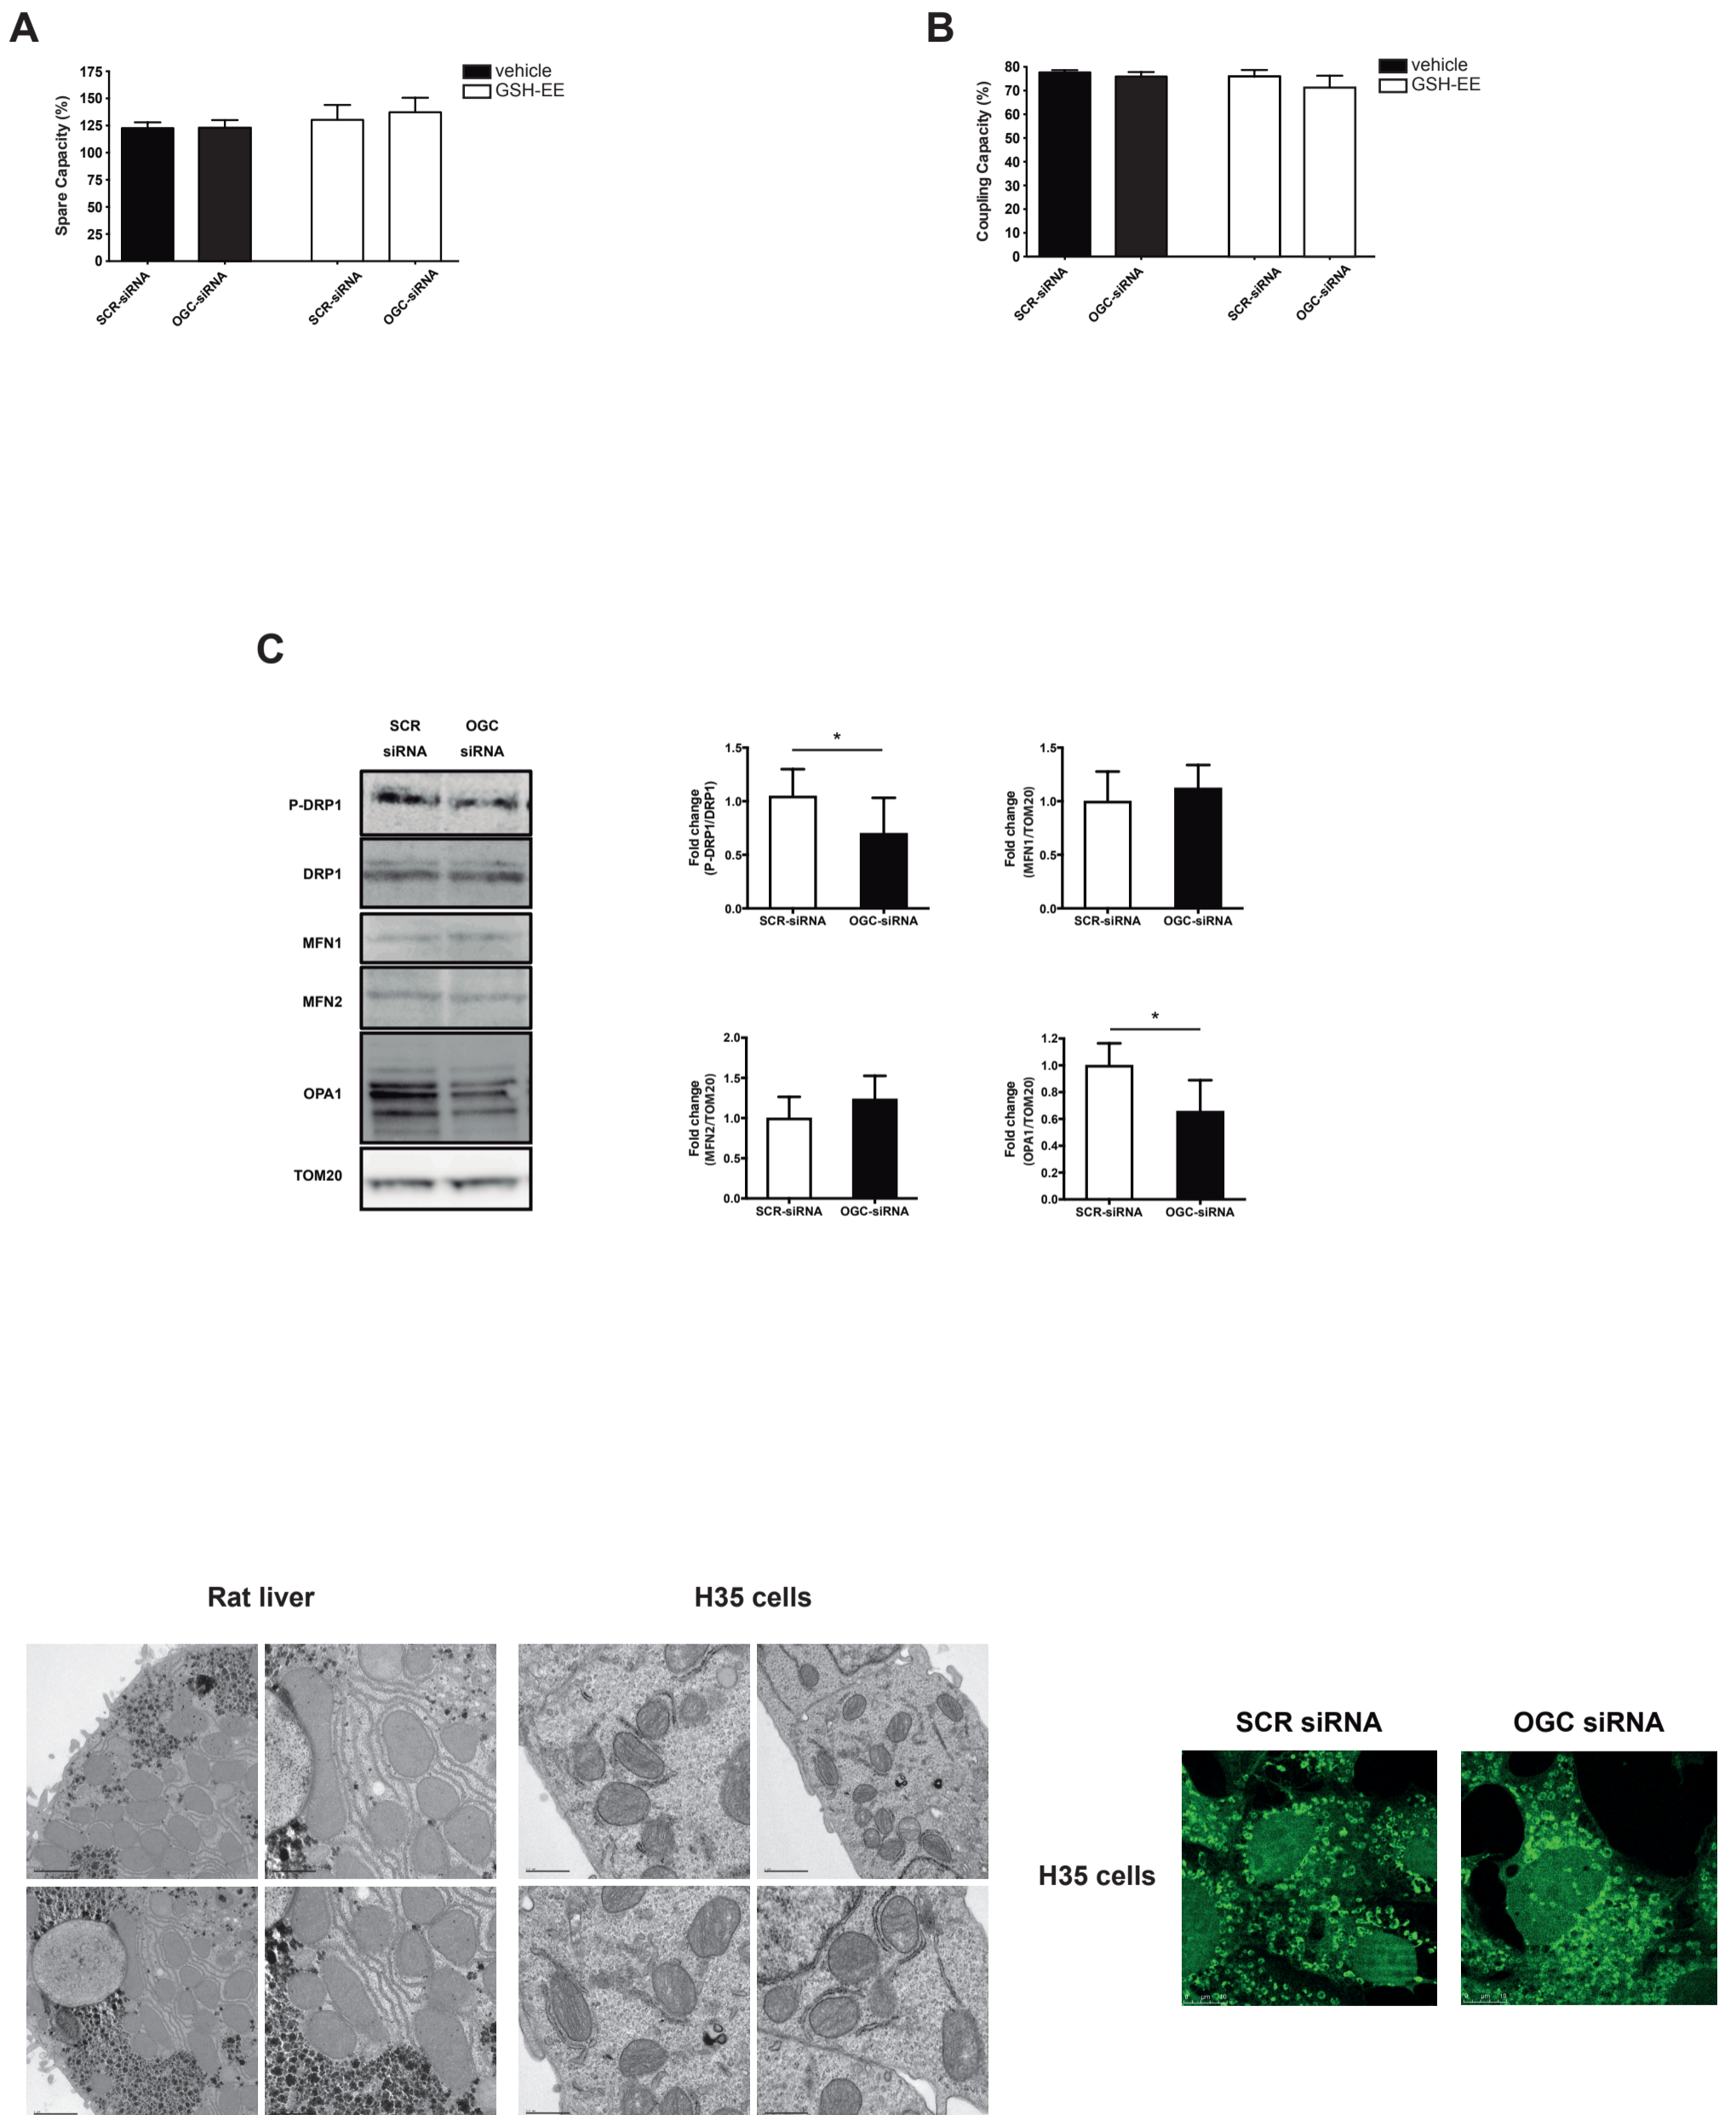

Supplement: mmc3.pdf [file mmc3.pdf]

# Supp. Figure 4

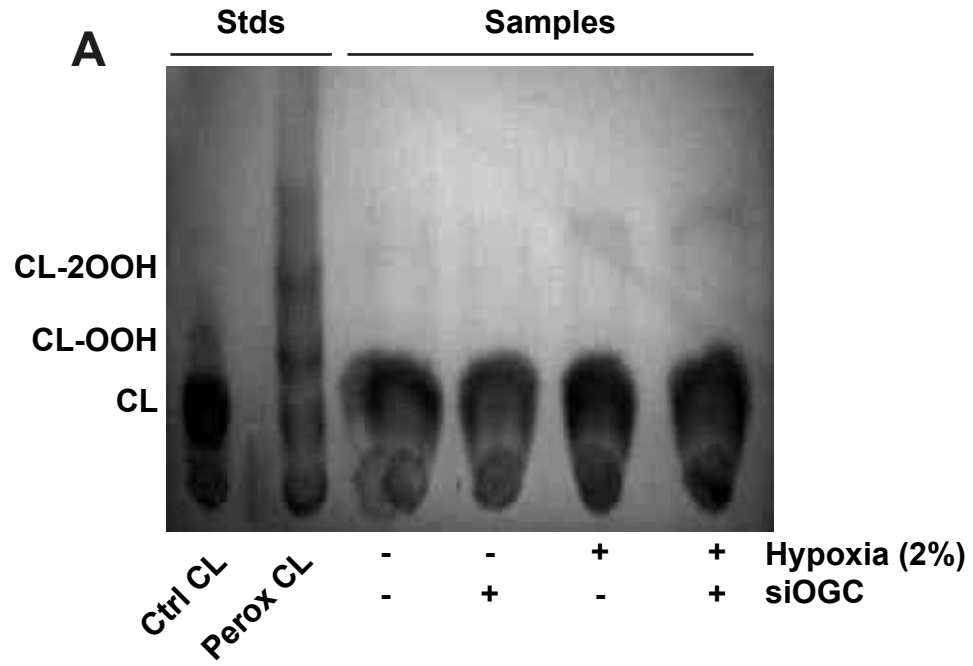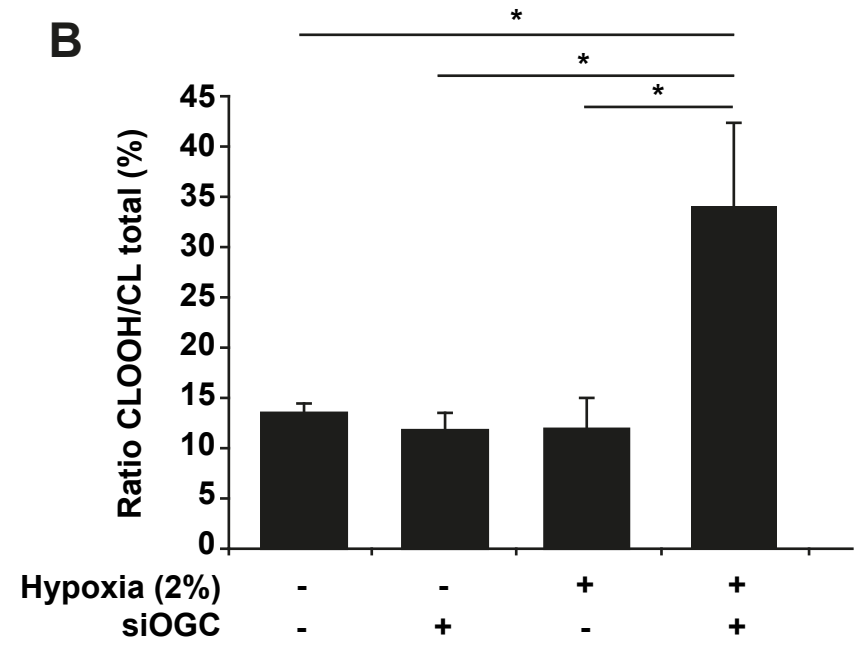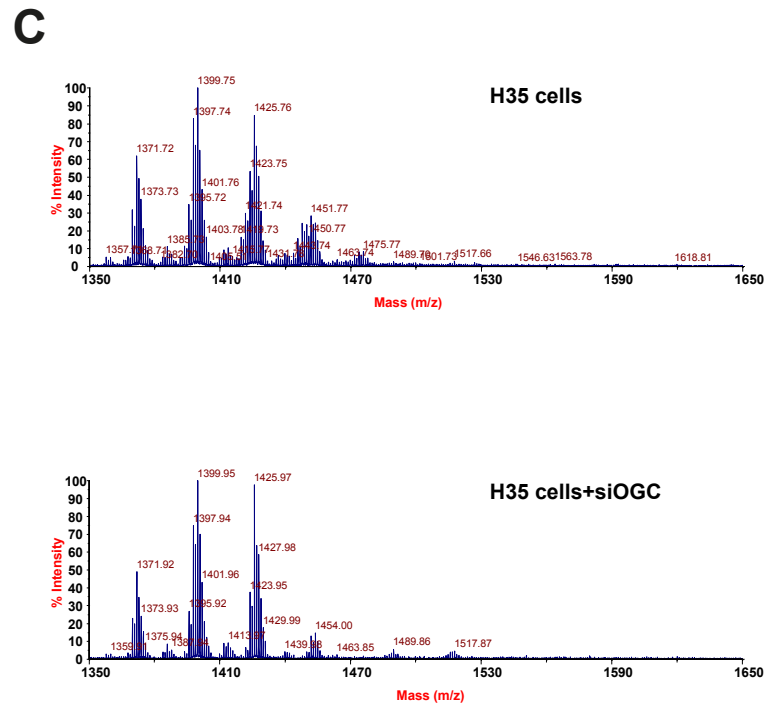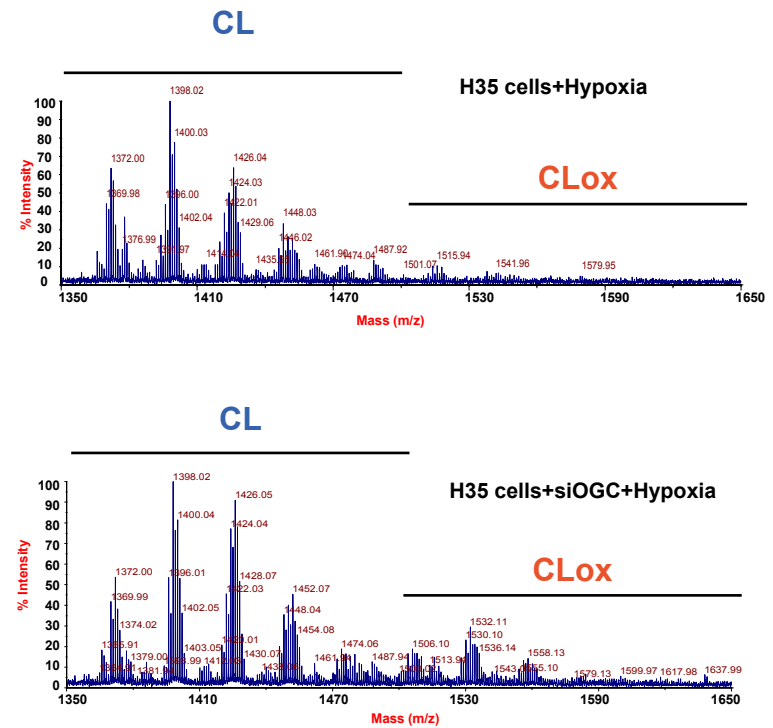

Supplement: mmc4.pdf [file mmc4.pdf]

# Supp. Figure 5

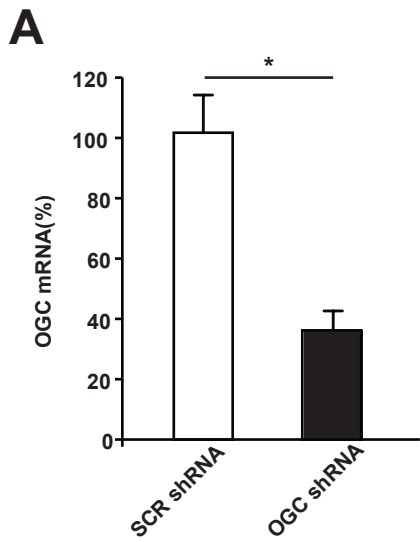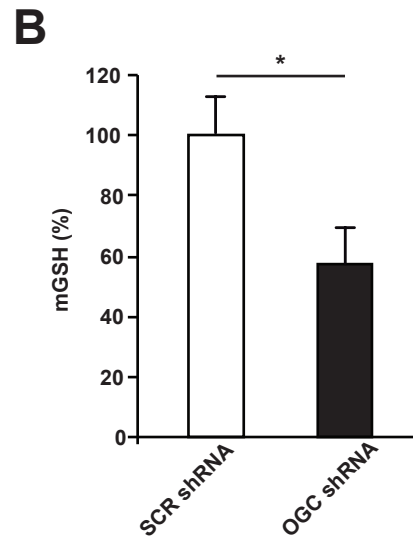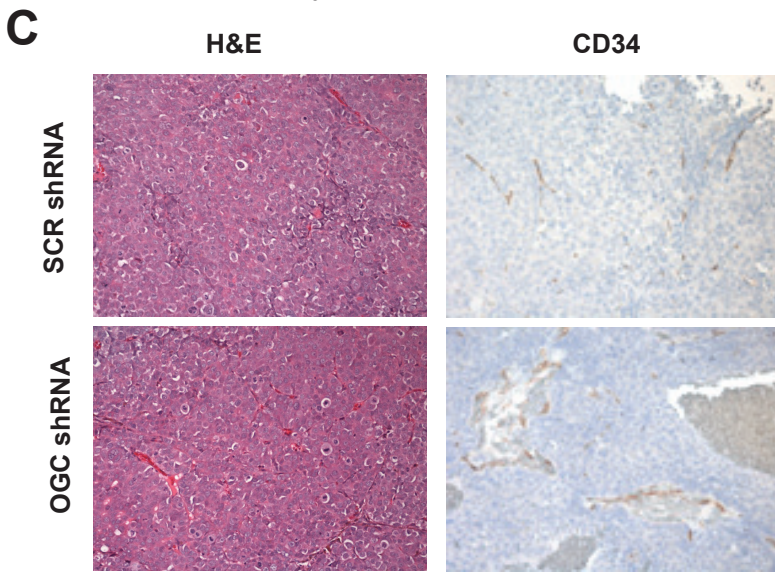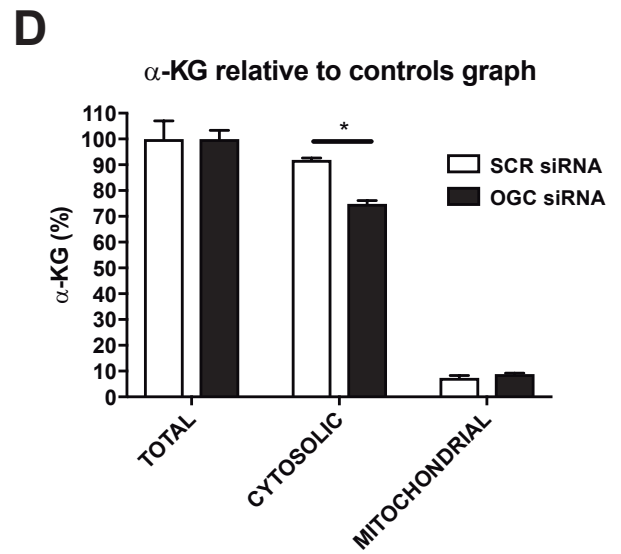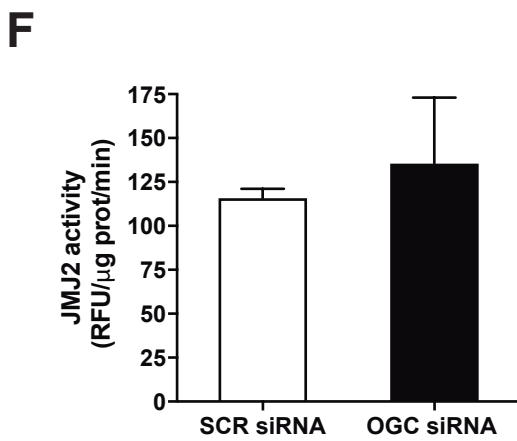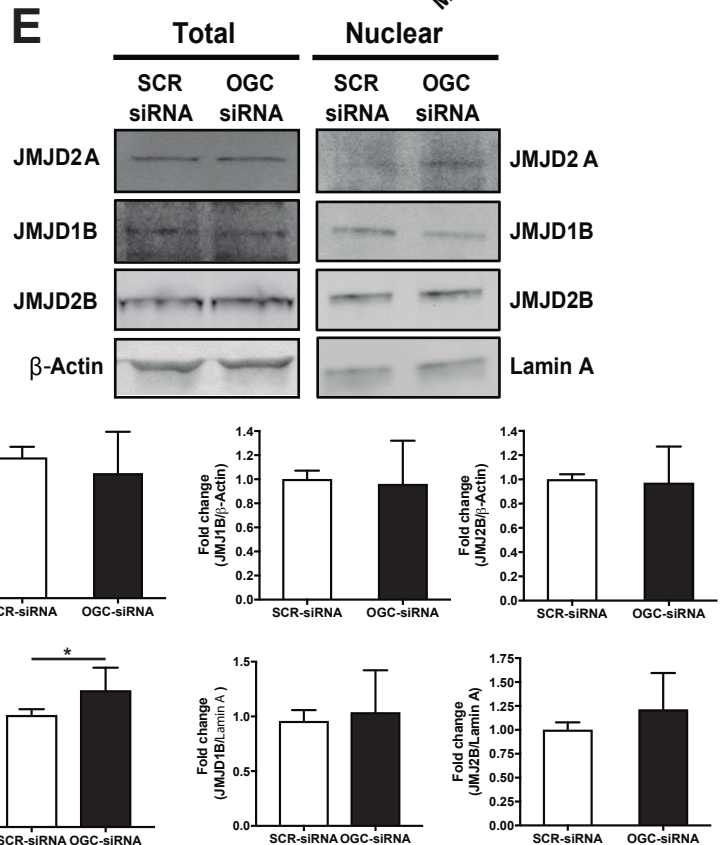

Supplement: mmc5.pdf [file mmc5.pdf]
